# Supplementary material for: On the importance of steady-state isotopic techniques for the investigation of the mechanism of the reverse water-gas-shift reactionElectronic supplementary information (ESI) available: experimental details. See http://www.rsc.org/suppdata/cc/b4/b403438d/
Source: Royal Society of Chemistry journal article supplement (doi:10.1039/b403438d), 2004-01-01
Supplement: b403438d.doc [file b403438d.doc]

**Electronic Supplementary Information (ESI).**

Experimental details:

The catalyst employed in this study was a 2% Pt/CeO2 supplied by Johnson Matthey. The BET surface area (measured with a Micromeritics ASAP 2010) was 180 m2 g-1, and the metal dispersion, measured by H2 chemisorption at 193 K using a Micromeritics Autochem 2910, was 17%. The species at the catalyst surface were monitored using an *in situ* diffuse reflectance IR (DRIFT) cell (from Spectra-Tech ®) fitted with ZnSe window and placed in a Bruker Equinox 55 spectrometer, operating at a resolution of 4 cm-1. The unlabelled gases were supplied by BOC (purity > 99.99%), while 13CO2 (99%) was provided by Cambridge Isotope Laboratories Inc. 30 mg of catalyst (particle diameter < 150 μm) were loaded in the DRIFT cell and pre-reduced *in situ* at 573 K in a flow of 40 cm3 min-1 of a 50% H2/Ar mixture. The cell was then purged with Ar and the temperature lowered to 498 K. A spectrum of the reduced sample was recorded in Ar and used as background against which IR absorbances were subsequently calculated. The RWGS feed (100 cm3 min-1, composition: 1% 12CO2 + 4% H2 in Ar) was then introduced and steady-state conditions were typically reached after 20 to 30 minutes. CO, CO2 and CH4 concentrations were measured on-line after the DRIFT cell both by gas chromatography and mass spectrometry. In the present case, the conversion of CO2 was 13.8% and the selectivity to CO and methane were 99.46% and 0.54%, respectively.
